# Supplementary material for: HDAC6 Negatively Regulates miR-155-5p Expression to Elicit Proliferation by Targeting RHEB in Microvascular Endothelial Cells under Mechanical Unloading
Source: Int J Mol Sci. 2021 Sep 29;22(19):10527. doi: 10.3390/ijms221910527 (PMC8508889; doi:10.3390/ijms221910527)
Supplement: Supplementary file 1 [file ijms-22-10527-s001.zip › ijms-1370275-SI.pdf]

## Supplementary Materials for

### HDAC6 negatively regulates miR-155-5p expression to elicit proliferation by targeting RHEB in microvascular endothelial cells under mechanical unloading

Liqun Xu<sup>1+</sup>, Lijun Zhang<sup>1+</sup>, Xiaoyan Zhang<sup>1</sup>, Gaozhi Li<sup>1</sup>, Yixuan Wang<sup>1</sup>, Jingjing Dong<sup>1</sup>, Honghui Wang<sup>1,2</sup>, Zebing Hu<sup>1</sup>, Xinsheng Cao<sup>1</sup>, Shu Zhang<sup>1\*</sup>, Fei Shi<sup>1\*</sup>

\*To whom correspondence should be addressed: Shu Zhang at shuzhang89@hotmail.com; Fei Shi at shifei719@fmmu.edu.cn.

**Table S1 Primer sequences used for RT-qPCR**

| Gene            | Sequence (5'~3')            |
|-----------------|-----------------------------|
| U6-F            | CTCGCTTCGGCAGCACA           |
| U6-R            | AACGCTTCACGAATTTGCGT        |
| mmu-miR-155-5p  | CCGCGTTAATGCTAATTGTGATAGGGG |
| mmu-miR-375-3p  | TTTGTTTCGTTCCGGCTCGCGT      |
| mmu-miR-7a-5p   | CGCGTGGAAGACTAGTGATTTTGTGT  |
| mmu-miR-212-3p  | TAACAGTCTCCAGTCACGGCC       |
| mmu-miR-206-3p  | CCGTGGAATGTAAGGAAGTGTGTGG   |
| mmu-miR-532-5p  | CATGCCTTGAGTGTAGGACCGT      |
| mmu-miR-181d-5p | CCAACATTCATTGTTGTCTGGTGGGT  |
| mmu-miR-183-5p  | CCGCTATGGCACTGGTAGAATTCCT   |
| mRQ 3' Primer   | TGGTGTCGTGGAGTCG            |
| GAPDH-F         | TGTGTCCGTCGTGGATCTGA        |
| GAPDH-R         | TTGCTGTTGAAGTCGCAGGAG       |
| RHEB-F          | AAGAAGGACCTGCATATGGAAA      |
| RHEB-R          | GAAGACTTTCCTTGTGAAGCTG      |
| HDAC6-F         | AGAAGATGATGAGTCACTGCAA      |
| HDAC6-R         | GTGACACATGATGCGTAAGATG      |

**Table S2 RNA oligo sequences for transfection**

| <b>Name</b>                       | <b>Sequence (5' - 3')</b> |
|-----------------------------------|---------------------------|
| <b>Mimic-NC sense</b>             | UUCUCCGAACGUGUCACGUTT     |
| <b>Mimic-NC antisense</b>         | ACGUGACACGUUCGGAGAATT     |
| <b>Inhibitor-NC</b>               | CAGUACUUUUGUGUAGUACAA     |
| <b>Mimic-155-5p sense</b>         | UUA AUGCUAAUUGUGAUAGGGGU  |
| <b>Mimic-155-5p antisense</b>     | CCCUAUCACAAUUAGCAUUAUU    |
| <b>Inhibitor-155-5p</b>           | ACCCCUAUCACAAUUAGCAUUA    |
| <b>Negative control sense</b>     | UUCUCCGAACGUGUCACGUTT     |
| <b>Negative control antisense</b> | ACGUGACACGUUCGGAGAATT     |
| <b>siRNA-HDAC6 sense</b>          | CCCAUCGCCUAUGAGUUUATT     |
| <b>siRNA-HDAC6 antisense</b>      | UAAACUCAUAGGCGAUGGGTT     |
| <b>siRNA-RHEB sense</b>           | GCCAAUUUGUUGAUUCCUATT     |
| <b>siRNA-RHEB antisense</b>       | UAGGAAUCAACAAAUUGGCTT     |

**Figure S1:**

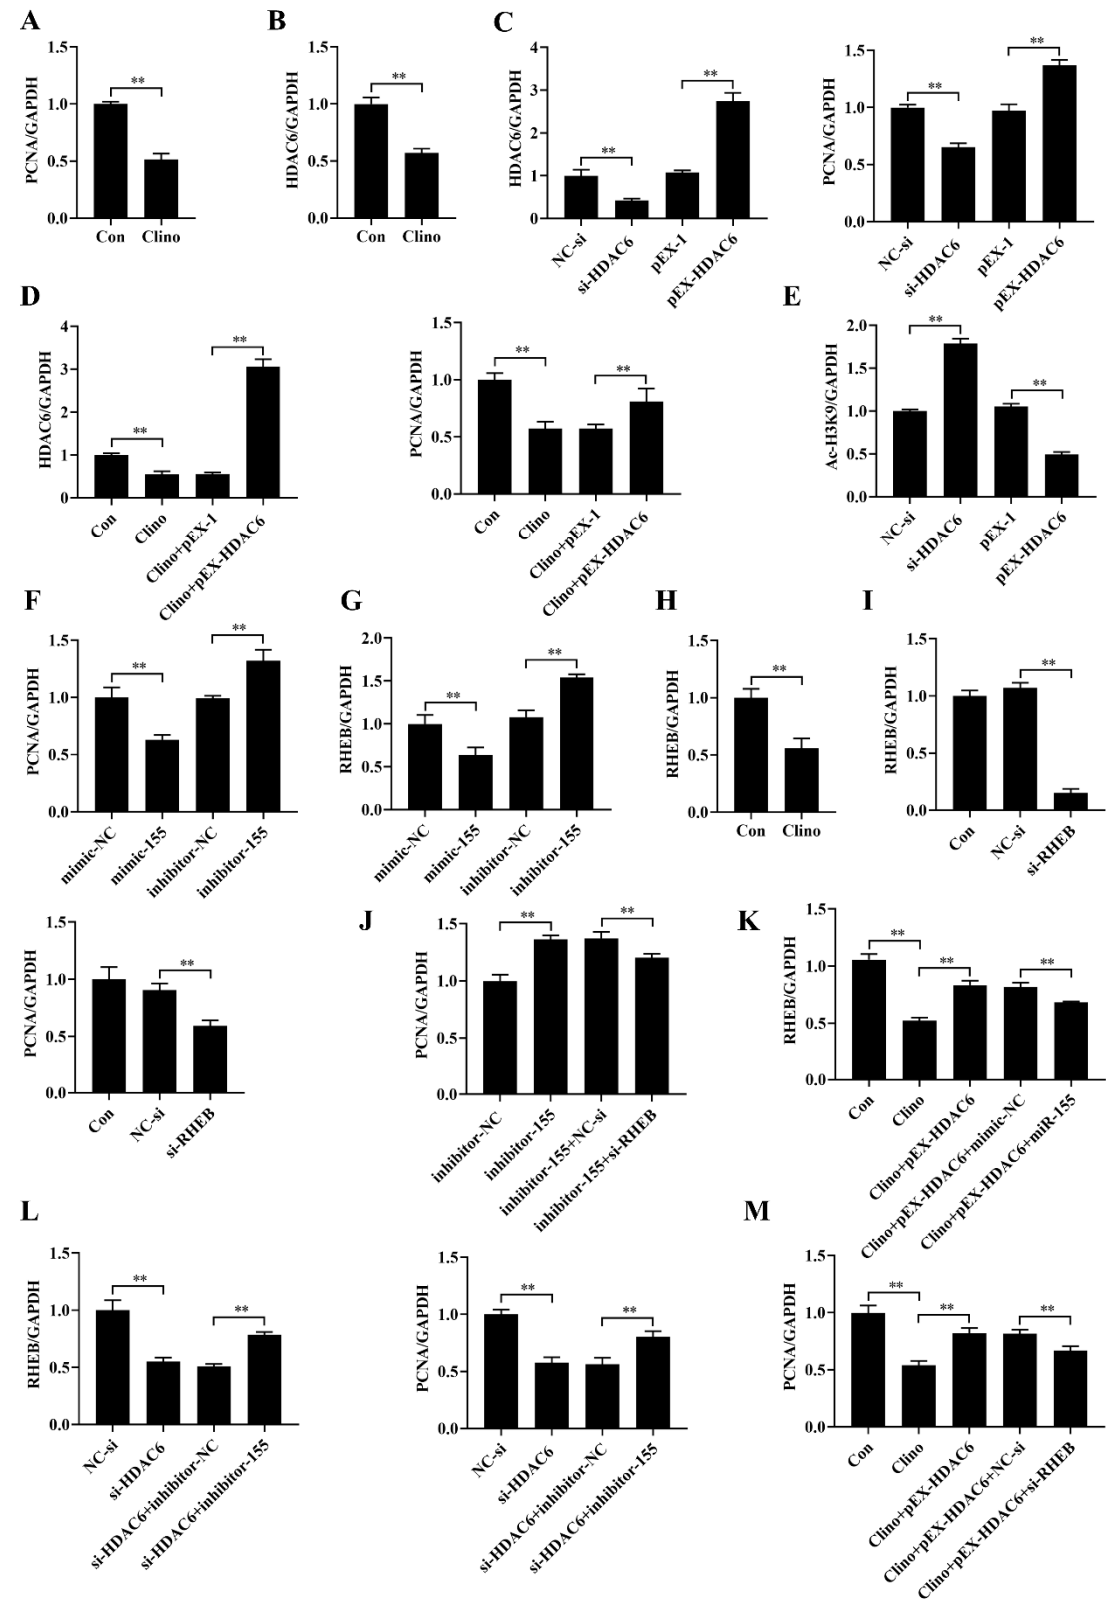

(A) Protein expression of PCNA was analyzed by Western blotting in microvascular endothelial cells that were cultured under clinorotation conditions for 48 h (N = 3). (B) The HDAC6 protein

level was analyzed by Western blotting (N = 3); (C) The HDAC6 and PCNA protein levels in microvascular endothelial cells were analyzed by Western blotting after transfection with HDAC6 siRNA or pEX-HDAC6 (N = 3); (D) The protein expression of HDAC6 and PCNA was analyzed by Western blotting after microvascular endothelial cells were transfected with pEX-HDAC6 and then cultured under mechanical unloading conditions for 48 h (N = 3); (E) Ac-H3K9 protein expression was analyzed by Western blotting in microvascular endothelial cells treated with HDAC6 siRNA, pEX-HDAC6 or the corresponding controls for 48 h (N = 3); (F) The protein expression of PCNA in microvascular endothelial cells was analyzed by Western blotting (N = 3); (G) Western blotting analysis of the protein expression of RHEB (N = 3); (H) The RHEB protein level was analyzed by Western blotting (N = 3); (I) The RHEB and PCNA protein levels in microvascular endothelial cells were analyzed by Western blotting after transfection with RHEB siRNA (N = 3); (J) PCNA protein levels were measured by Western blotting after co-transfecting inhibitor-155-5p and siRNA-RHEB into microvascular endothelial cells (N = 3); (K) RHEB protein expression was analyzed by Western blotting after microvascular endothelial cells were transfected with pEX-HDAC6 alone or pEX-HDAC6 plus mimic-155 and subjected to clinorotation unloading for 48 h (N = 3); (L) Western blotting analysis of RHEB and PCNA protein expression (N = 3); (M) PCNA protein expression was analyzed by Western blotting after microvascular endothelial cells were transfected with pEX-HDAC6 alone or pEX-HDAC6 plus siRNA-RHEB and subjected to clinorotation unloading for 48 h (N = 3).
